# Supplementary material
Source: PubMed Central journal article supplement (PMC3975592)
Supplement: NIHMS566853-supplement-Supplementary_Material.pdf [file NIHMS566853-supplement-Supplementary_Material.pdf]

## Legends to Supplementary Figures

**Legend to Figure S1.** Analysis of the genetic interaction between 53BP1 and ATM in organismal growth and development. A, body weight of 8 week-old *Trp53bp1<sup>-/-</sup>/Atm<sup>-/-</sup>* and control female mice. Similar data was obtained for males (not shown). B, representative microphotographs of mice in A. C, thymi of the indicated genotypes were disaggregated and the number of cells counted. D, for immunophenotyping, thymocytes were stained with antibodies to CD4 and CD8 and analyzed by flow cytometry; a representative experiment is shown. The percentage of double positive (CD4<sup>+</sup>/CD8<sup>+</sup>) thymocytes and more mature single-positive (CD4<sup>+</sup> or CD8<sup>+</sup>) thymocytes are indicated. E, spleens were disaggregated and the number of splenocytes counted after red cell lysis. To calculate the number of T cells, splenocytes were stained with antibodies to CD4 and CD8 and the number of CD4<sup>+</sup> and CD8<sup>+</sup> cells was added. F, representative example of staining as described in F. G, to calculate the number of B cells, splenocytes were counted and stained with antibodies to B220 and IgM to determine the percentage of B220<sup>+</sup>/IgM<sup>+</sup> cells (B cells) within the population. H, representative example of spleens stained as described in G. I, H/E staining of testis from 8 week-old *Atm<sup>-/-</sup>* and *Trp53bp1<sup>-/-</sup>/Atm<sup>-/-</sup>* mice reveals severe germ cell depletion. All bars in the figure represent the average and standard deviation of 3-5 mice per genotype.

**Legend to Figure S2.** Analysis of ploidy in *Trp53bp1<sup>-/-</sup>/Atm<sup>-/-</sup>* lymphomas. A, histograms indicate the distribution of the number of chromosomes per metaphase in two *Atm<sup>-/-</sup>* and six *Trp53bp1<sup>-/-</sup>/Atm<sup>-/-</sup>* thymic lymphomas. At least 20 metaphases per tumor were

analyzed. B, representative examples of euploid (top) or modestly aneuploidy (bottom) *Trp53bp1<sup>-/-</sup>/Atm<sup>-/-</sup>* tumor metaphases.

**Legend to Figure S3.** Analysis of *Trp53bp1<sup>-/-</sup>/Atm<sup>-/-</sup>* thymic lymphomas by TCR $\alpha/\delta$  locus FISH. Representative metaphases from a control *Atm<sup>-/-</sup>* lymphoma and five *Trp53bp1<sup>-/-</sup>/Atm<sup>-/-</sup>* lymphomas hybridized with the indicated probes. “Split” BAC signals and amplification of sequences upstream to the TCR $\alpha/\delta$  locus were found in all tumors.

**Legend to Figure S4.** SKY analysis of two *Trp53bp1<sup>-/-</sup>/Atm<sup>-/-</sup>* lymphomas. A, representative SKY hybridization showing two clonal translocations: t(12,14) and t(14,15).

**Legend to Figure S5.** Cell cycle analysis of resting lymphocytes after IR. Splenocytes were exposed to IR (2 Gy) and harvested at the indicated timepoints for staining with propidium iodide and analysis by flow cytometry. Data from two independent experiments is shown. The percentage of cells in subG1 (blue) is an indicator of cell death.

**Legend to Figure S6.** Aberrant *Vd2-Dd1/Dd2-Jd1* coding junctions are not detected in *Trp53bp1<sup>-/-</sup>/Atm<sup>-/-</sup>* mice. Coding junctions were PCR amplified from thymic DNA of 7-day old mice of the following genotypes: wt (n=3 mice), *Trp53bp1<sup>-/-</sup>* (n=4 mice), *Atm<sup>-/-</sup>* (n=3 mice) and *Trp53bp1<sup>-/-</sup>/Atm<sup>-/-</sup>* (n=4 mice). For reference, a rearranged coding junction

is given at the top of the figure. *Dd2* and *Dd1* gene segments are in red; nucleotide additions are in blue. A single large deletion is indicated in parentheses.

**Legend to Figure S7.** Aberrant *Vd5-Dd2* Recombination Signal Junctions are not detected in *Trp53bp1<sup>-/-</sup>/Atm<sup>-/-</sup>* mice. Signal junctions were PCR amplified from thymic DNA of 7-day old mice of the following genotypes: wt (n=2 mice), *Trp53bp1<sup>-/-</sup>* (n=2 mice), *Atm<sup>-/-</sup>* (n=2 mice) and *Trp53bp1<sup>-/-</sup>/Atm<sup>-/-</sup>* (n=2 mice). Top, *Vd5* and *Dd2* RSSs and flanking coding sequences. Heptamer and nonamer elements are indicated in red; coding sequences are in boldface. Below, sets of sequences from wild-type, *Trp53bp1<sup>-/-</sup>*, *Atm<sup>-/-</sup>*, and *Trp53bp1<sup>-/-</sup>/Atm<sup>-/-</sup>* joints. The number of occurrences of each sequence is indicated at right. N additions are indicated in blue; deletions are indicated by parentheses.

**Legend to Figure S8.** Histograms showing the frequency distribution of deletions from each coding end (A-D) and signal end (E-F) analyzed. No clear differences across genotypes are observed. No imprecise recombinant junction was counted more than once, even if it was represented more than once among the PCR products.

**Legend to Figure S9.** Cell cycle analysis of activated (cycling) lymphocytes after IR. Splenocytes were activated with  $\alpha$ -CD40+IL-4 for two days, exposed to IR (2 Gy) and harvested at the indicated timepoints. Cells were stained with propidium iodide and analyzed by flow cytometry. Data is representative of five independent experiments.

**Legend to Figure S10.** Analysis of genomic stability in splenic B or T cells treated with olaparib. Cells of the indicated genotypes were activated with either  $\alpha$ -CD40+IL-4 (B cells) or concanavalin A (T cells) and treated with 1  $\mu$ M olaparib or vehicle for 24 hours prior to fixation. Colcemid was added in the last four hours. A, percentage of B cell metaphases containing chromosomal aberrations; B, number of aberrations per B cell metaphase. C, number of chromatid breaks per B cell metaphase. D, percentage of T cell metaphases containing chromosomal aberrations; E, number of aberrations per T cell metaphase. F, number of chromatid breaks per T cell metaphase. G, Representative examples of olaparib-treated B cell metaphases. Yellow arrows point to chromosome breaks; white arrows point to chromatid breaks and fusions.

**Legend to Figure S11.** Analysis of the G2/M checkpoint.  $\alpha$ -CD40/IL-4-activated B cells were harvested one hour after exposure to 2 Gy of IR, stained with a FITC-labeled antibody to phospho(P)-histone H3 (Ser10) and propidium iodide (PI) and analyzed by flow cytometry. Mock-irradiated controls were harvested in parallel. A, Percentage of P-H3(Ser10)<sup>+</sup> cells in irradiated cultures, normalized to mock-irradiated controls. Individual dotplots for the same cultures are shown in (B). The average and standard deviation of the number of P-H3(Ser10)<sup>+</sup> cells in the 3 *Atm*<sup>-/-</sup> and the 3 *Trp53bp1*<sup>-/-</sup>/*Atm*<sup>-/-</sup> mice in A-B is shown in C. Data was normalized to untreated cells.

**Legend to Figure S12.** A second primer set detects deletions at hybrid V(D)J recombination junctions in *Trp53bp1*<sup>-/-</sup>/*Atm*<sup>-/-</sup> thymic DNA from 7 day-old mice. A, assay

for *Dβ2-Vβ14* hybrid joints in *Trp53bp1<sup>-/-</sup>/Atm<sup>-/-</sup>* DNA using a primer set in which nested primer pairs are equidistant from the expected recombinant junction (see methods). Representative assays for two mice of each genotype are shown, representing 3 experiments. B-C, diagrams and sequences of aberrant hybrid joints, respectively, as described in Figure 5. N additions are shown in blue; potential microhomologies are underlined and size of deletions is shown in parenthesis.

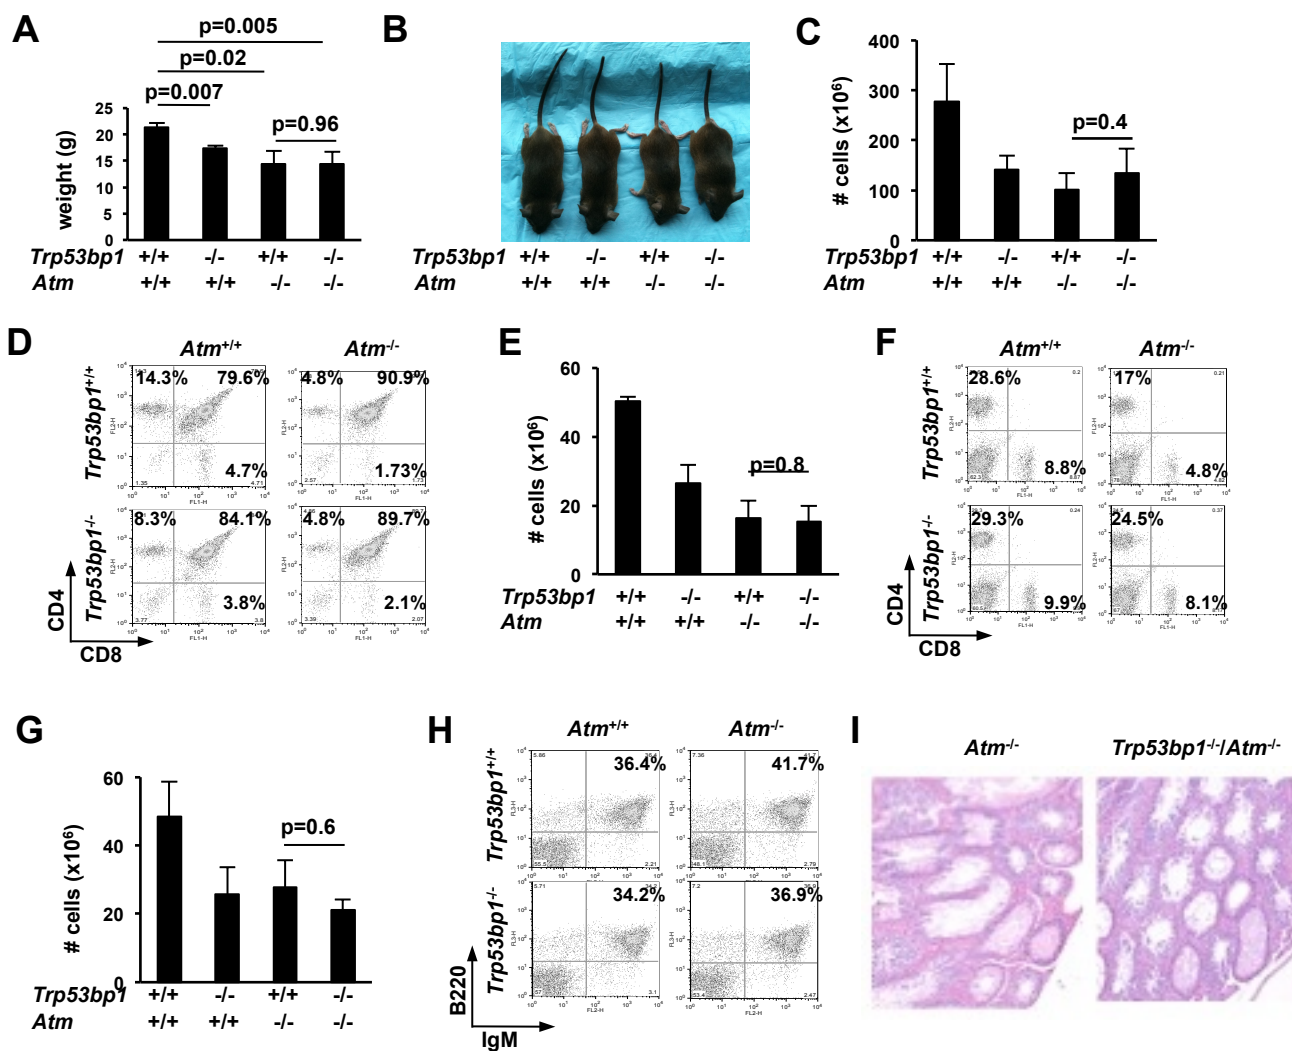

Figure S1

**A**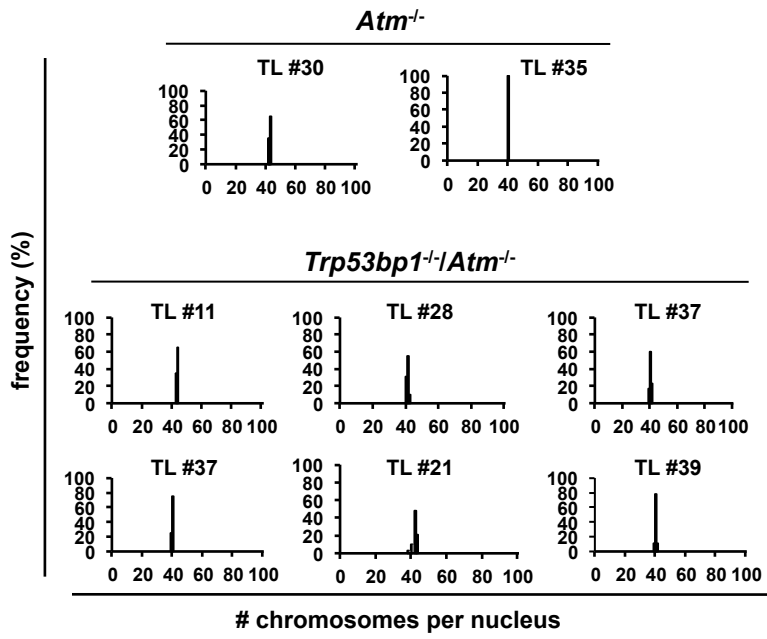**B**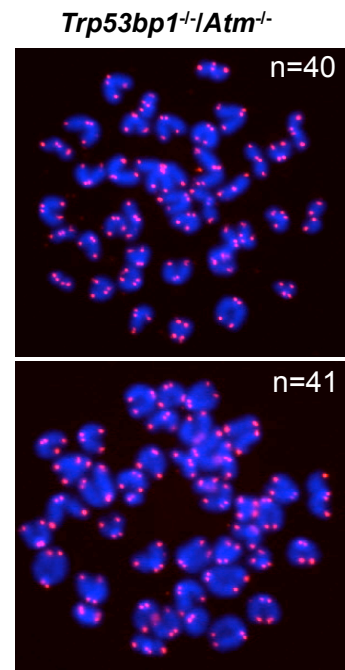

Figure S2

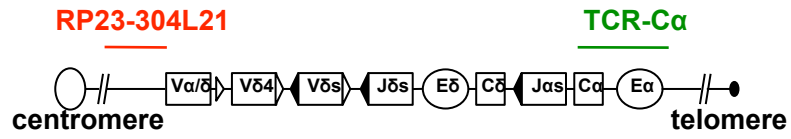

*Tcra/δ* status (Ch14)

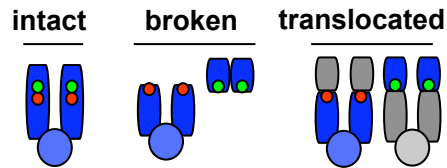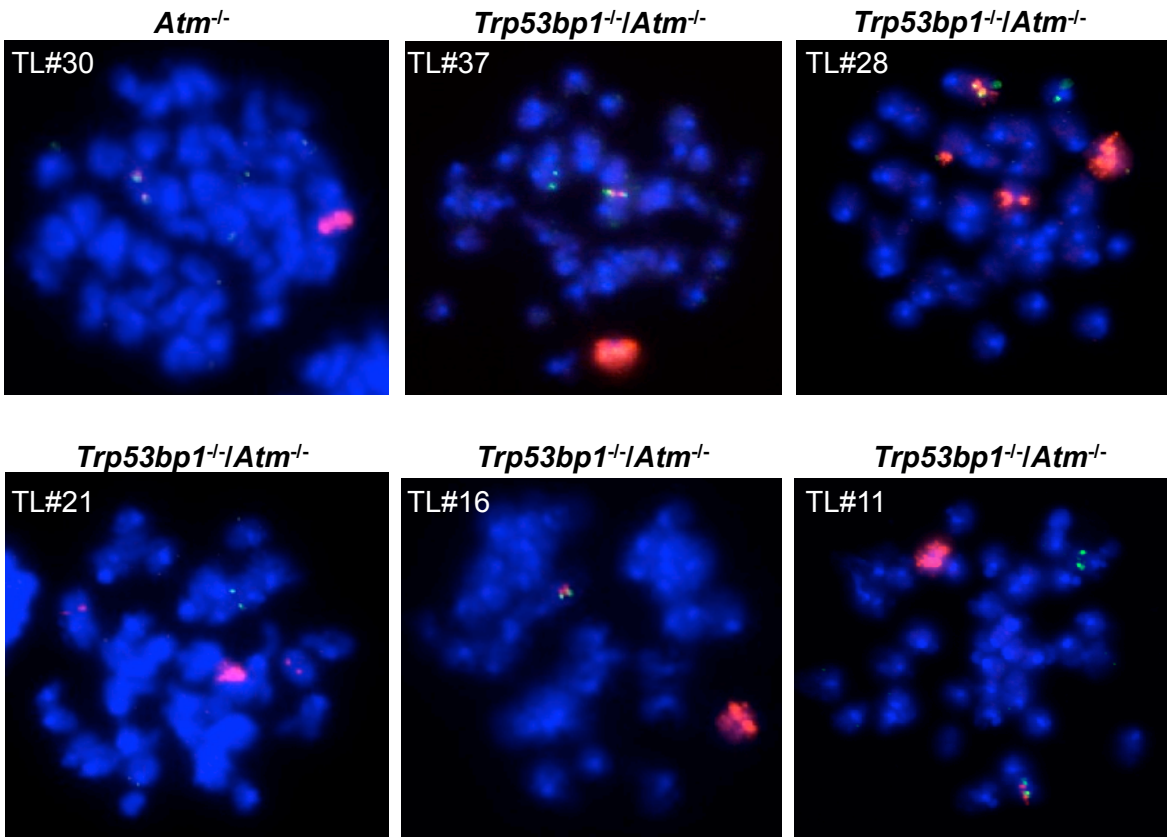

RP23-304L21 Cα

Figure S3



**A***Trp53bp1<sup>-/-</sup>/Atm<sup>-/-</sup>*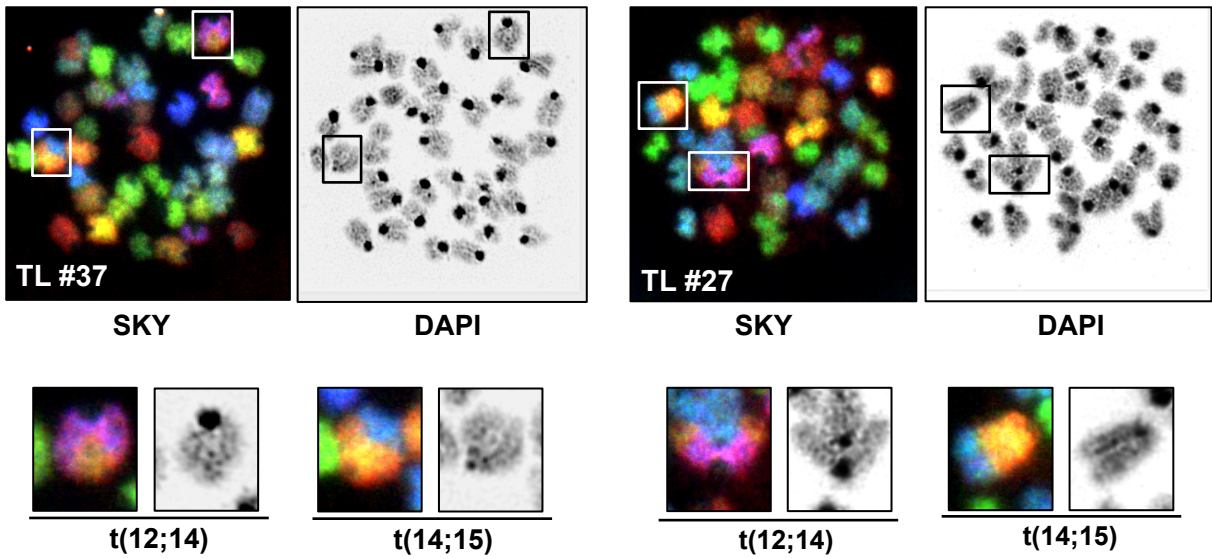**B**

**Karyotype of *Trp53bp1<sup>-/-</sup>/Atm<sup>-/-</sup>* lymphomas**

| Tumor ID | # metaphases | clonal translocations (# metaphases)              |
|----------|--------------|---------------------------------------------------|
| TL #37   | 7            | t(12;14) <sup>(7)</sup> ; t(14;15) <sup>(7)</sup> |
| TL #27   | 7            | t(12;14) <sup>(7)</sup> ; t(14;15) <sup>(7)</sup> |

**Figure S4**

experiment#1

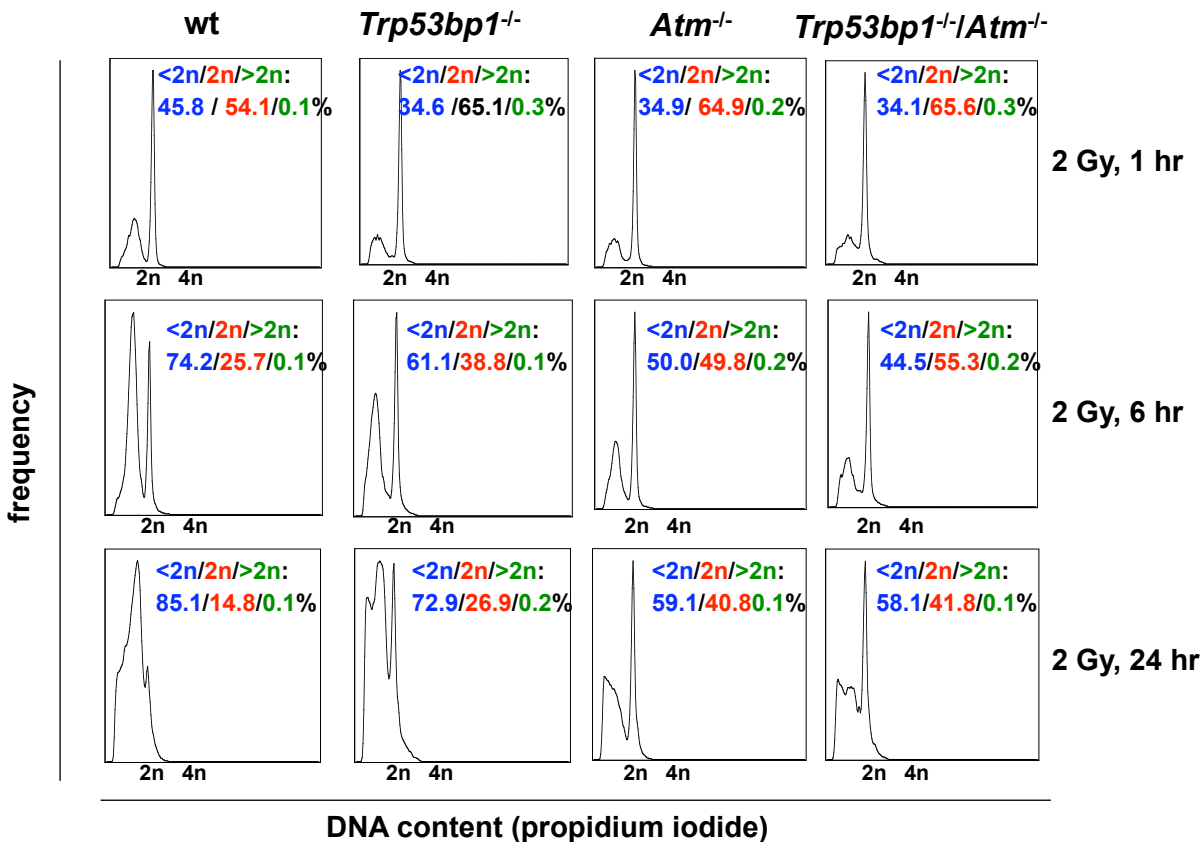

experiment#2

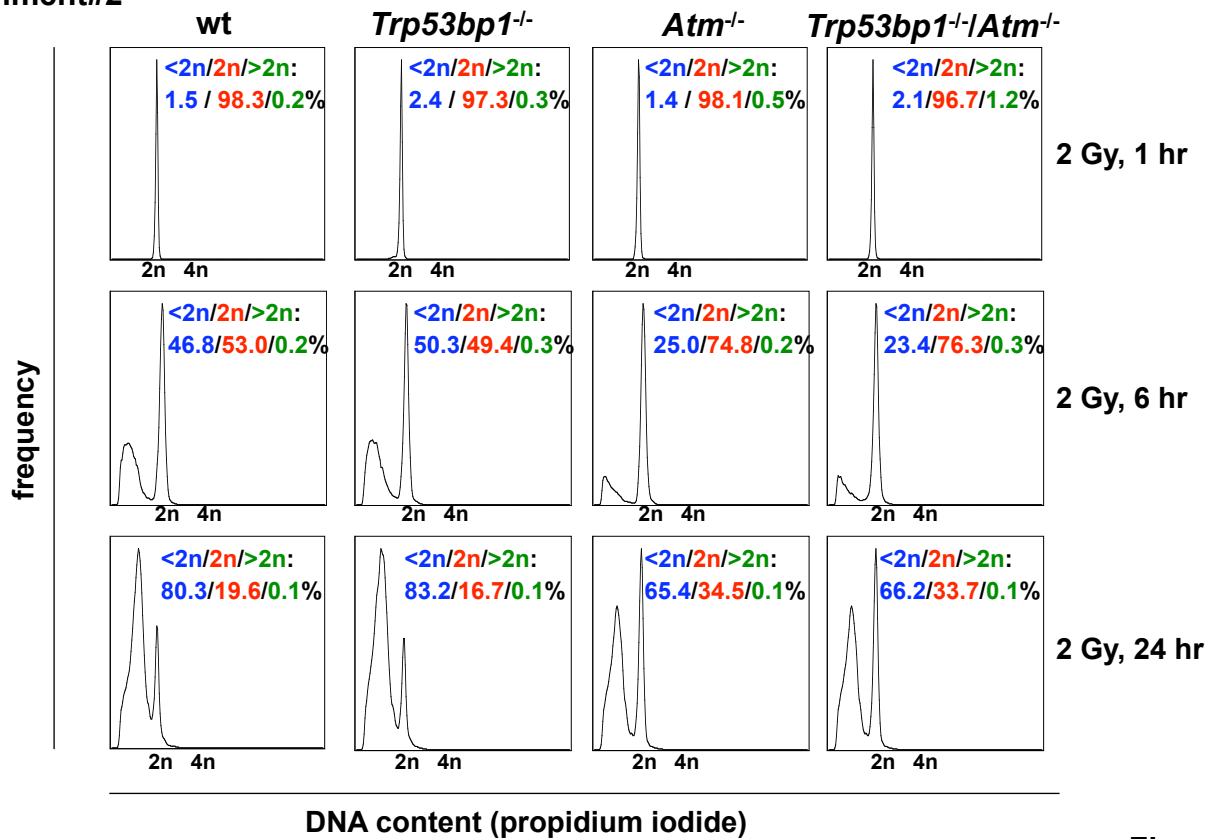

Figure S5

CTCAGGCACCTTACCTCTGTGGAGGGAAAG-----GTGGCATAT-----CTACCGACAAACTCGTCTTTGGACAAGGA  
 D52 ATCGGAGGGATACGAG

wt (17)

CTCAGGCACCTTACCTCTGTGGAGGGAAA----C----ATCGGAGGGATACGAG----CTC----CCGACAAACTCGTCTTTGGACAAGGA  
 CTCAGGCACCTTACCTCTGTGGAGGGAAAG--CTTACC----CGGAGGGATACGAG--C----ACCGACAAACTCGTCTTTGGACAAGGA  
 CTCAGGCACCTTACCTCTGTGGAGGG-----G--AT--ATCGGAGGG-----GCGCG--CTACCGACAAACTCGTCTTTGGACAAGGA  
 CTCAGGCACCTTACCTCTGTGGAGGGAA----GCGAGG----CGGAGGGAT-----GG----CTACCGACAAACTCGTCTTTGGACAAGGA  
 CTCAGGCACCTTACCTCTGTGGAGGGAAAG-TGGCATATCCCCAATATCGGAGGGATACGAG--CTACCGACAAACTCGTCTTTGGACAAGGA  
 CTCAGGCACCTTACCTCTGTGGAGGGAAAG-GC-GGCAT-ATCGGAGGGATAC-----CGACAAACTCGTCTTTGGACAAGGA  
 CTCAGGCACCTTACCTCTGTGGAGGGAAAG--CTCC----TCGGAGGGATACGAG--TT-----CCGACAAACTCGTCTTTGGACAAGGA  
 CTCAGGCACCTTACCTCTGTGGAGGGAAAG--CGA-----CGGAGGGATACGAG--CTA-----CCGACAAACTCGTCTTTGGACAAGGA  
 CTCAGGCACCTTACCTCTGTGGAGGGAAAG--G-----GGAGGG-----CCCTCTA-----CCGACAAACTCGTCTTTGGACAAGGA  
 CTCAGGCACCTTACCTCTGTGGAGGGAA-----TCGGAGGGATACGAG-----ACAAACTCGTCTTTGGACAAGGA  
 CTCAGGCACCTTACCTCTGTGGAGGG-----GGC--CTC--CGGAGGGATACGAG-----CTA-----CCGACAAACTCGTCTTTGGACAAGGA  
 CTCAGGCACCTTACCTCTGTGGAGGGAAAG-----T-----ATCGGAGGGATACG-----G-----ACCGACAAACTCGTCTTTGGACAAGGA  
 CTCAGGCACCTTACCTCTGTGGAGGGAA-----G-----ATAT--CGGGGGGG--CGGA--C--ACCGACAAACTCGTCTTTGGACAAGGA  
 CTCAGGCACCTTACCTCTGTGGAGGGAA--GTGGCAT--ATCGGAGGGATACGAG-----CTACCGACAAACTCGTCTTTGGACAAGGA  
 CTCAGGCACCTTACCTCTGTGGAGGGAA--C--GTGGCATAT--GG--GGGATACGAG--CTTGG--TACCGACAAACTCGTCTTTGGACAAGGA  
 CTCAGGCACCTTACCTCTGTGGAGGGAAAG--T-----GAG-----ACCGACAAACTCGTCTTTGGACAAGGA

Atm-/- (18)

CTCAGGCACCTTACCTCTGTGG-----GAG-----ATCGGAGGGAT-----CG----CTACCGACAAACTCGTCTTTGGACAAGGA  
 CTCAGGCACCTTACCTCTGTGGAGGGAAAG-AG-GG-----CGGAGGGATA-----T-----CGACAAACTCGTCTTTGGACAAGGA  
 CTCAGGCACCTTACCTCTGTGGAGGGAAAG--TTTCG-GGC-CAT-ATCGGAGGGATACGAG-T-----CGACAAACTCGTCTTTGGACAAGGA  
 CTCAGGCACCTTACCTCTGTGGAGGGAA-----G-AT-G-ATCGGAGGGATA-G-----CTACCGACAAACTCGTCTTTGGACAAGGA  
 CTCAGGCACCTTACCTCTGTGGAGGGAAAG--CC-----CGGAGGGATACGAG-----CTACCGACAAACTCGTCTTTGGACAAGGA  
 CTCAGGCACCTTACCTCTGTGGAGGGAA-----GGGATAC-----CGACAAACTCGTCTTTGGACAAGGA  
 CTCAGGCACCTTACCTCTGTGGAGG-----C-----TG-----CTACCGACAAACTCGTCTTTGGACAAGGA  
 CTCAGGCACCTTACCTCTGTGGAGGG-----T-----ATAT--CGGAGGGATACGA--AGGG---CGACAAACTCGTCTTTGGACAAGGA  
 CTCAGGCACCTTACCTCTGTGGAGGGAAA--A-----TCGGAGGGATACGAG-----CTACCGACAAACTCGTCTTTGGACAAGGA  
 CTCAGGCACCTTACCTCTGTGGAGGGAA-----G--GC-----CGGAGGGATACGAG-----CTACCGACAAACTCGTCTTTGGACAAGGA  
 CTCAGGCACCTTACCTCTGTGGAGGGAA-----CAT--CGGAGG-----CTACCGACAAACTCGTCTTTGGACAAGGA  
 CTCAGGCACCTTACCTCTGTGGAGGGAAAG--TTT--GG--A--AGGG-----CCCAG---CTACCGACAAACTCGTCTTTGGACAAGGA  
 CTCAGGCACCTTACCTCTGTGGAGGGAAA-----CGGAGGGATAC-----CGACAAACTCGTCTTTGGACAAGGA  
 CTCAGGCACCTTACCTCTGTGGAGGGAA-----GAT-----GACAAACTCGTCTTTGGACAAGGA  
 CTCAGGCACCTTACCTCTGTGGAGGGAAAG--CTCC--GG--G--GGGATACGAG-----CTACCGACAAACTCGTCTTTGGACAAGGA  
 CTCAGGCACCTTACCTCTGTGGAGGGAAAG--GGA--CATAT--CGGAGGGATA--AG-----CTACCGACAAACTCGTCTTTGGACAAGGA  
 CTCAGGCACCTTACCTCTGTGGAGGGAAAG--AGG--GGC--CGGAGGGATA--GAGA-----CGACAAACTCGTCTTTGGACAAGGA  
 CTCAGGCACCTTACCTCTGTGGAGGGAA-----GAT-----GACAAACTCGTCTTTGGACAAGGA

Trp53BP1-/- (8)

CTCAGGCACCTTACCTCTGTGGAGGGAAAG-GCA-A---ATCGGAGGGATACGAG-----CTACCGACAAACTCGTCTTTGGACAAGGA  
 CTCAGGCACCTTACCTCTGTGGAGGGAAAG--A-----CGGAGGGATACGAG-----CTACCGACAAACTCGTCTTTGGACAAGGA  
 CTCAGGCACCTTACCTCTGTGGAGGGAA-----GTGGCATAT--CGGAGGGATACGAG--ACC---ACCGACAAACTCGTCTTTGGACAAGGA  
 CTCAGGCACCTTACCTCTGTGGAGGGAAAG-AGGGAAAA--CGGAGGGATACGAG--CTGT---CCGACAAACTCGTCTTTGGACAAGGA  
 CTCAGGCACCTTACCTCTGTGGAGGGAAAGCTTTCCTCG-AT-ATCGGAGGGATACGAG--AA---TACCGACAAACTCGTCTTTGGACAAGGA  
 CTCAGGCACCTTACCTCTGTGGAGGG-----CAT-----ATCGGAGGGATACGAG-----CTACCGACAAACTCGTCTTTGGACAAGGA  
 CTCAGGCACCTTACCTCTGTGGAGGGAAA-C-GTGGCATAT--AGGGGATACGAG-----CTACCGACAAACTCGTCTTTGGACAAGGA  
 CTCAGGCACCTTACCTCTGTG-----GGGGAA--GTG-----GGGATACGAG-----CTACCGACAAACTCGTCTTTGGACAAGGA

Atm-/-, Trp53bp1-/- (18)

CTCAGGCACCTTACCTCTGTGGAGGGAAAG--C-CA--CGGAGGGATACGAG-----AGGG---CCGACAAACTCGTCTTTGGACAAGGA  
 CTCAGGCACCTTACCTCTGTGGAGGGAAAG-----GGCATAT--CGGAGGGATA--CTACCGACAAACTCGTCTTTGGACAAGGA  
 CTCAGGCACCTTACCTCTGTGGAGGGAAAG-----ATAT--CGGAGGGATACG--CCTCTCG--CTACCGACAAACTCGTCTTTGGACAAGGA  
 CTCAGGCACCTTACCTCTGTGGAGGGAA-----TCGGAGGGATACG-----CTACCGACAAACTCGTCTTTGGACAAGGA  
 CTCAGGCACCTTACCTCTGTGGAGGGAAA--TTGGGGAGG--GTGGCATAT-ATCGGAGGGATAC-----CGACAAACTCGTCTTTGGACAAGGA  
 CTCAGGCACCTTACCTCTGTGGAGGGAAAG--A--GGC--CGGAGGGATACG--CCG---CTACCGACAAACTCGTCTTTGGACAAGGA  
 CTCAGGCACCTTACCTCTGTGGAGGGAAAG--C-----TGGC-----CCGACAAACTCGTCTTTGGACAAGGA  
 CTCAGGCACCTTACCTCTGTGGAGGGAAA--AGAG-----ATCGGAGG-----ACCGACAAACTCGTCTTTGGACAAGGA  
 CTCAGGCACCTTACCTCTGTGGAGGGAA--T-----ATCGGAGGGATACGA-----CAAACCTCGTCTTTGGACAAGGA  
 CTCAGGCACCTTNCCTCTGTGGAGGGAAA--A-----AGGGATACG--C-----ANCGACAAACTCNCTTNNNACAAGGA  
 CTCAGGCACCTTACCTCTGTGGAGGGAA-----TAT--CGGAGGGATACG-----ACAAACTCGTCTTTGGACAAGGA  
 CTCAGGCACCTTACCTCTGTGGAGGG-----G-----GTGG--T-ATCGGAGGGATA--AAGAAC---ACAAACTCGTCTTTGGACAAGGA  
 CTCAGGCACCTTACCTCTGTGGAGGG-----CC--TAT--ATCGGAGGGATACGAG-----AA-----CGACAAACTCGTCTTTGGACAAGGA  
 CTCAGGCACCTTACCTCTGTGGAGGGAA-GAACGGGG--GGCA--CCC--CGAG--GGT-----CGACAAACTCGTCTTTGGACAAGGA  
 CTCANGCACCTTACCTCTGTGGAGGGAAAG-C-----TGGCATAT--CGGAGGGATACGAG-----CTACCGACAAACTCGTCTTTGGACAAGGA  
 CTCAGGCACCTTACCTCTGTGGAGGGAAAG-CCCCGCC--TAT--CGGAGGG--TTCCCG--CTACCGACAAACTCGTCTTTGGACAAGGA  
 CTCAGGCACCTTACCTCTGTGGAGGGAAAG-----ATCG-ATTTGGCC--CATAT-ATCGGAGGGAT--GACAAACTCGTCTTTGGACAAGGA  
 GTGGGTTGATAATAATGATGCTATCACTTGGGAAATATGGAGTAGGGATCACCATCT(-351)CTACCGACAAACTCGTCTTTGGACAAGGA



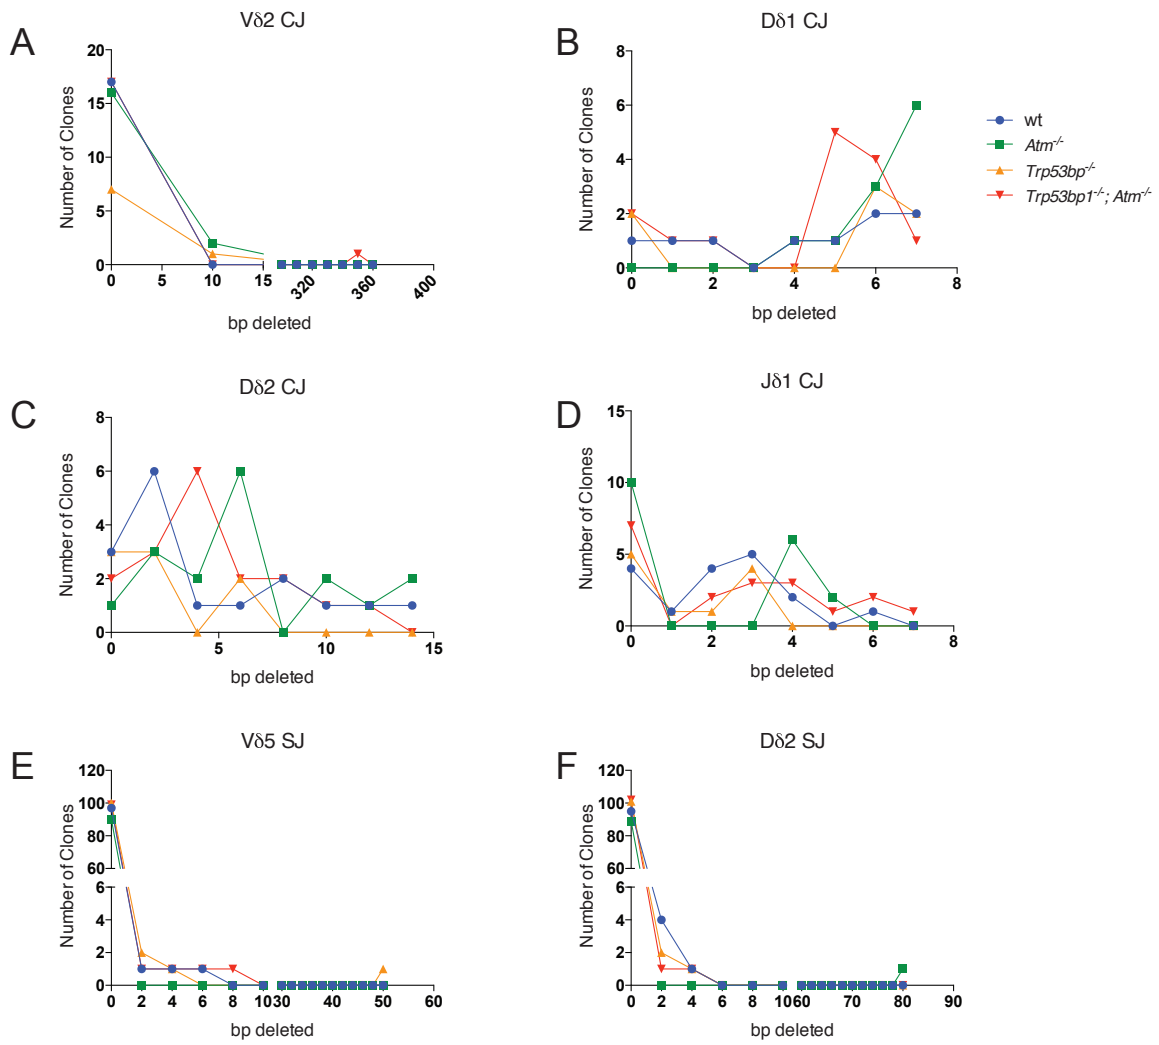

Figure S8

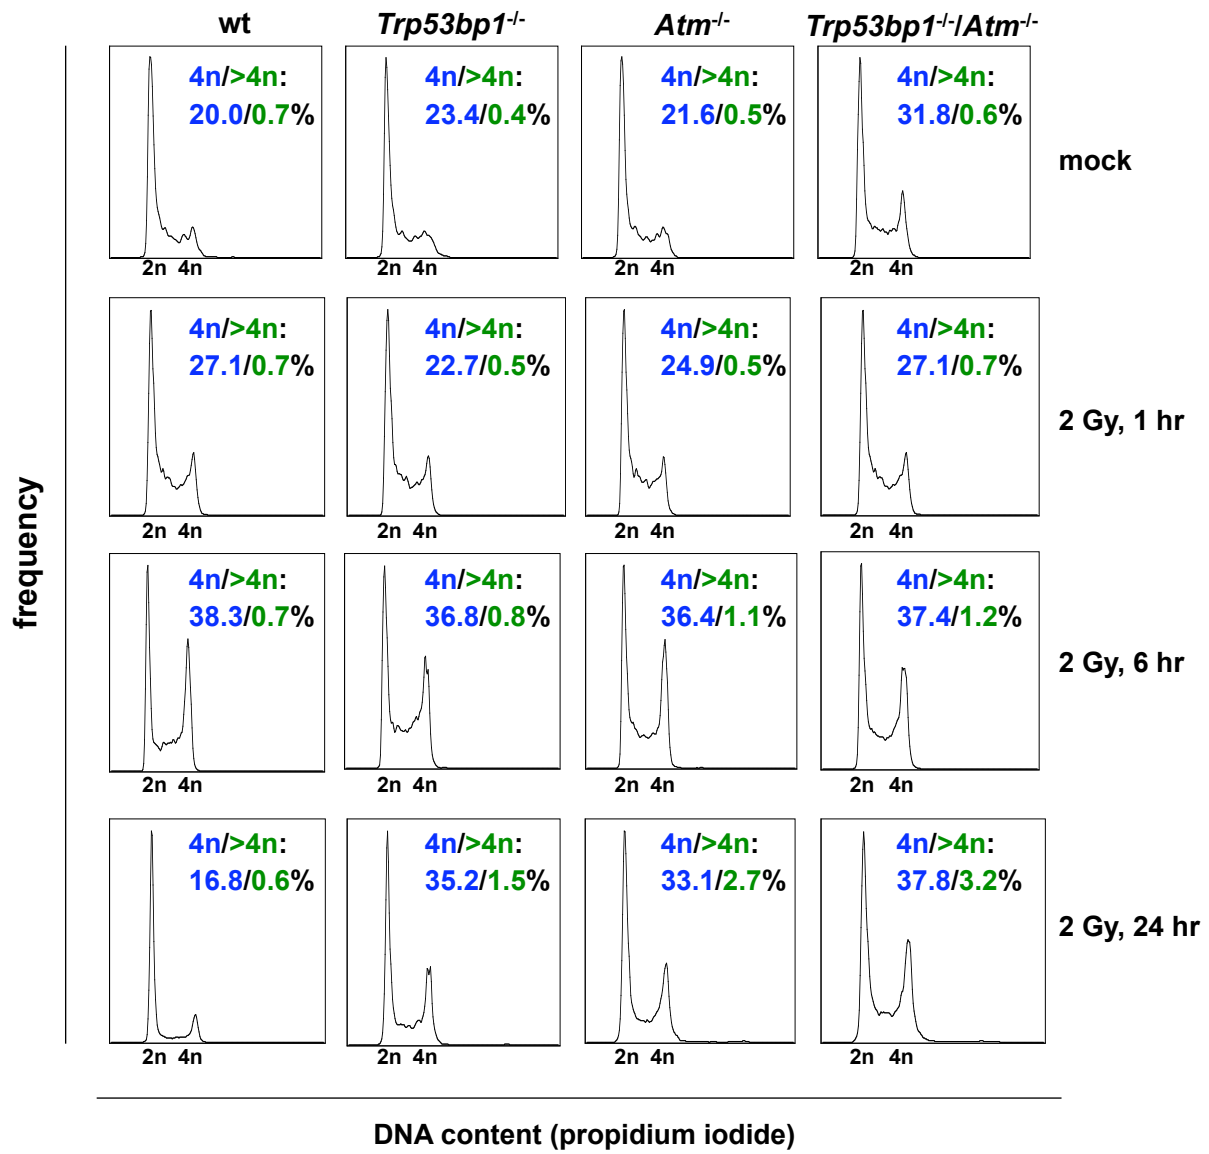

Figure S9

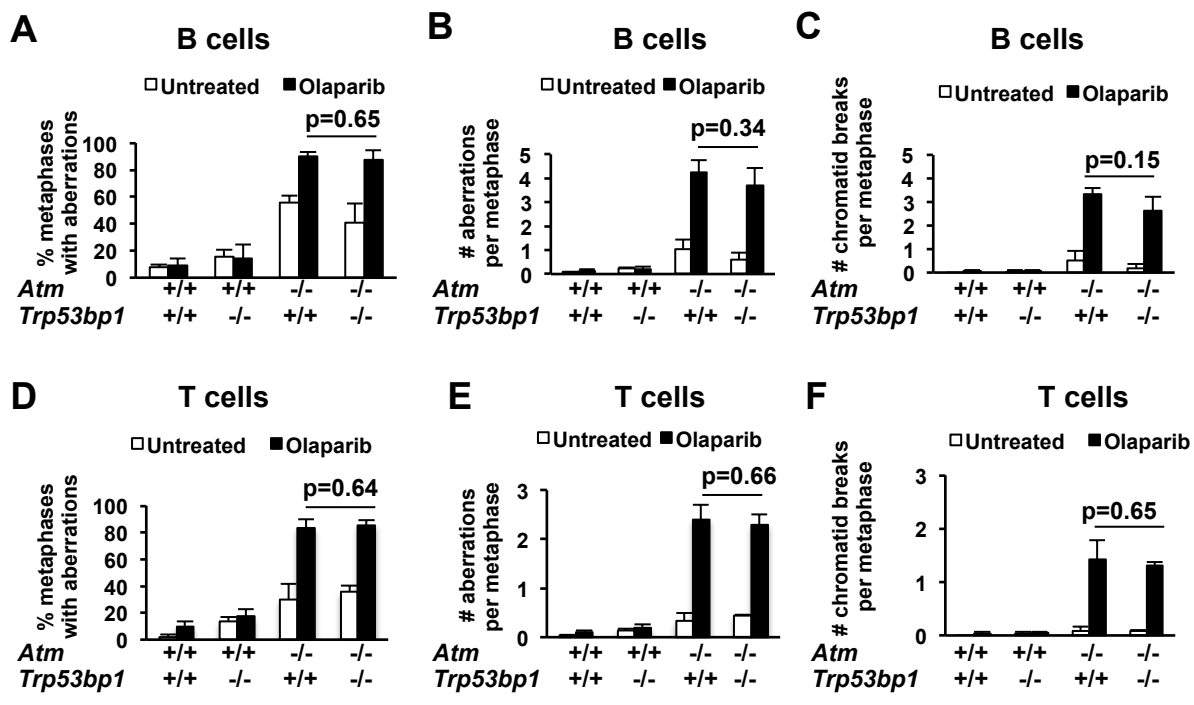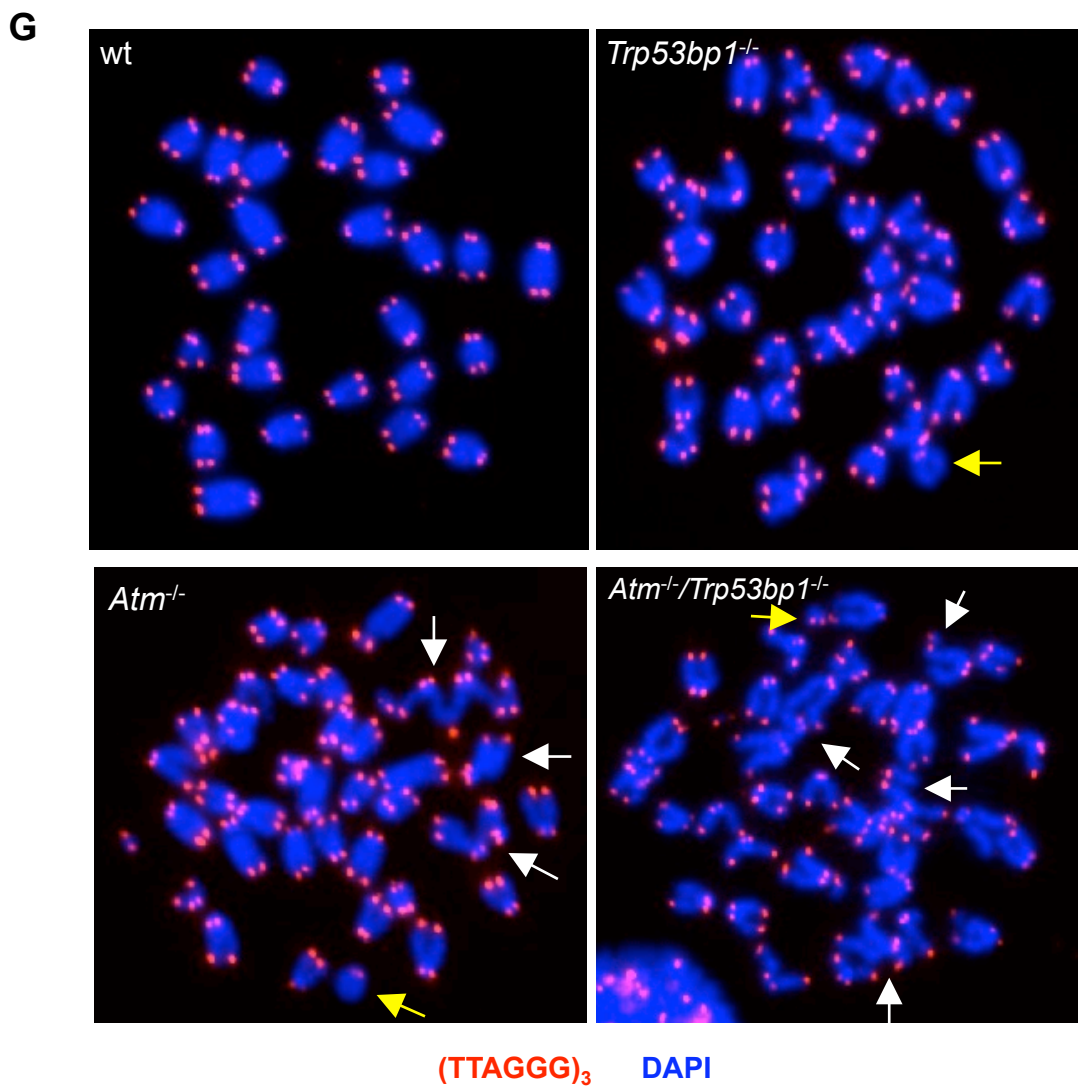

Figure S10

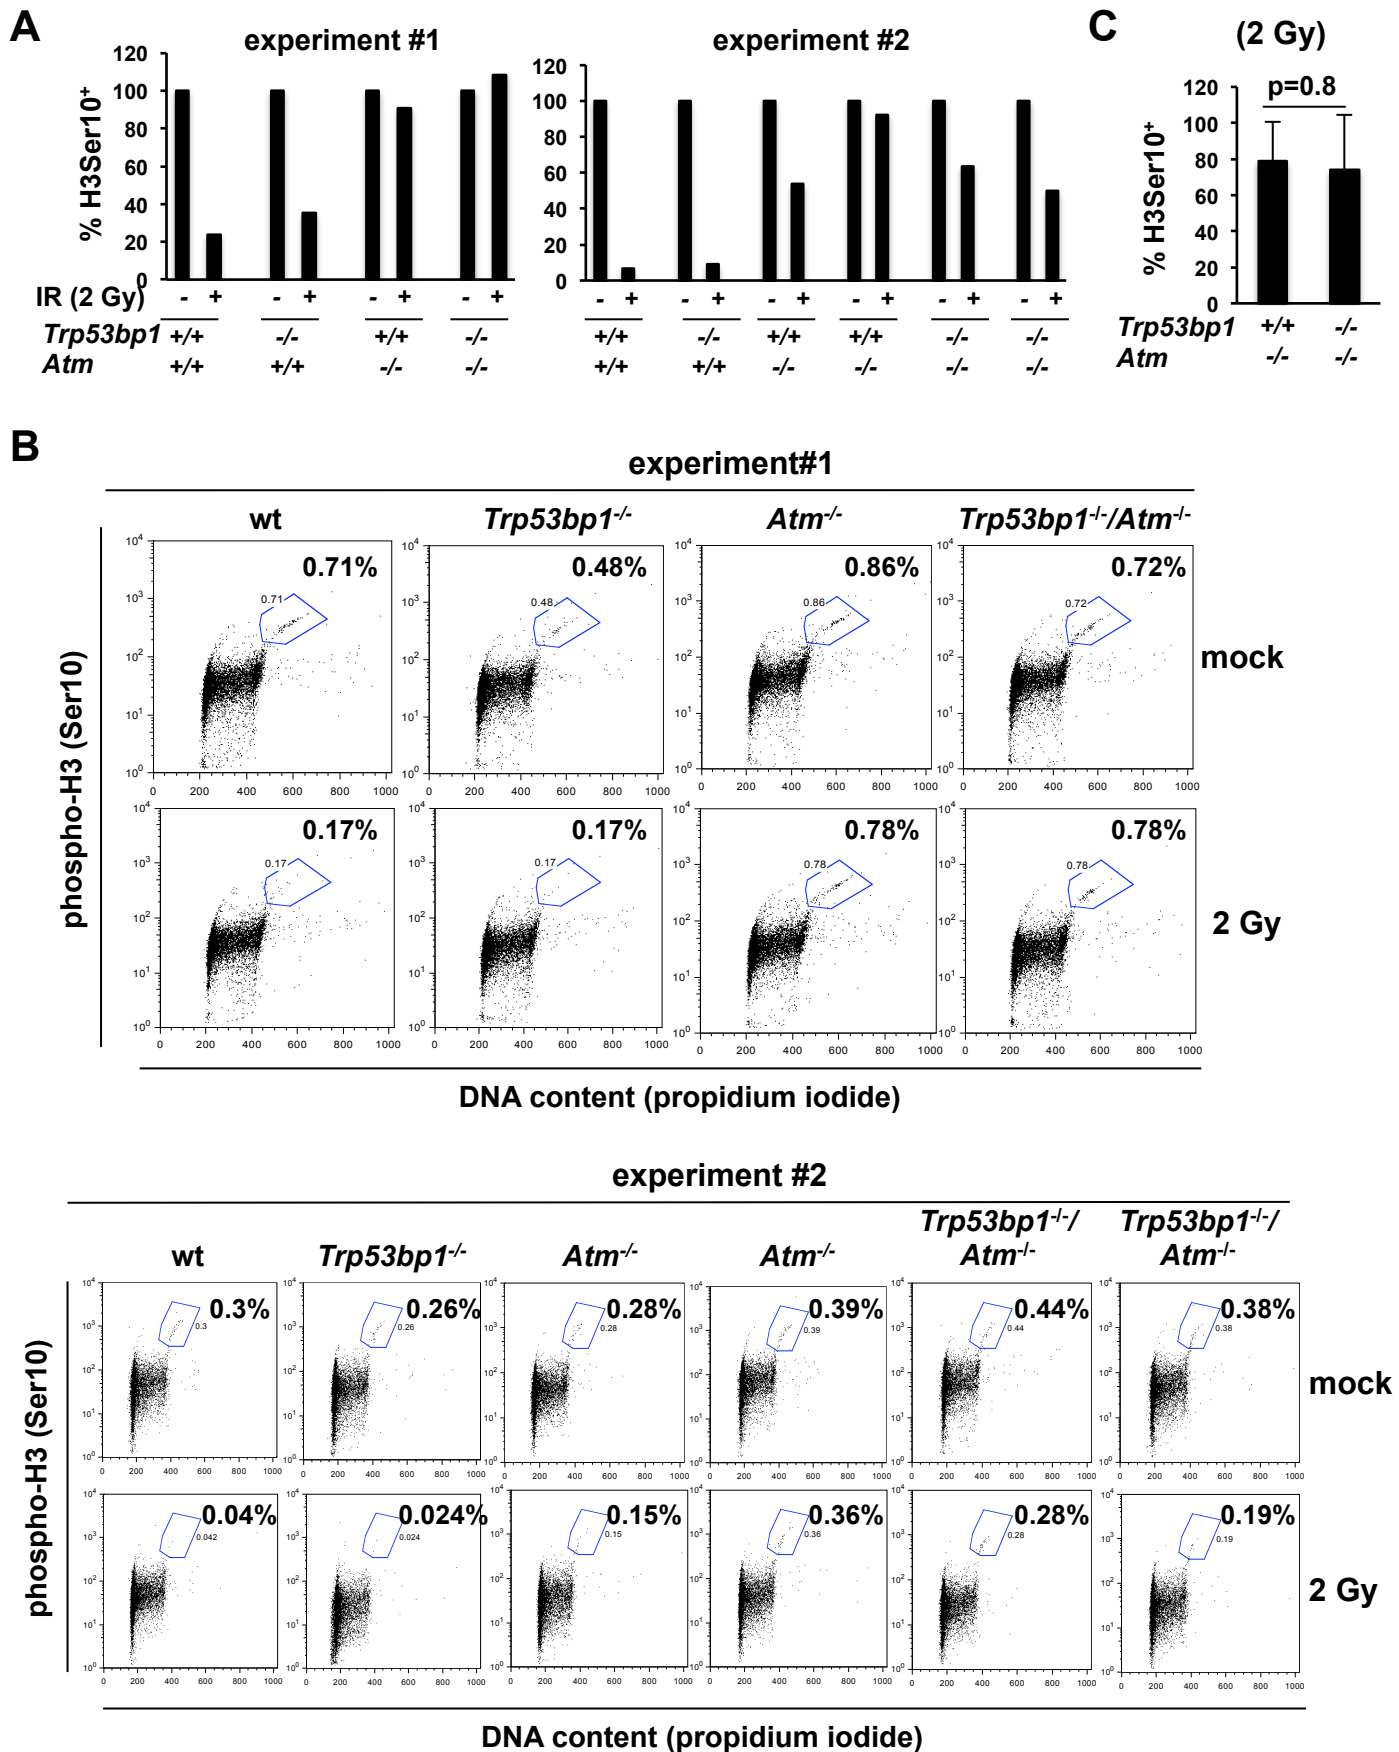

Figure S11



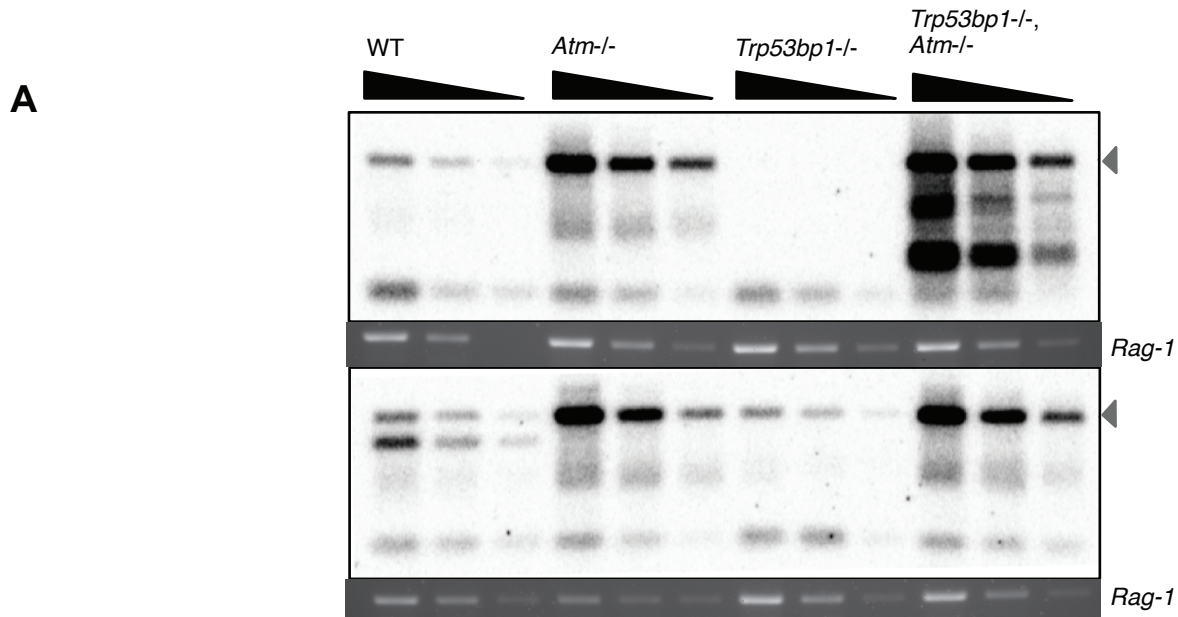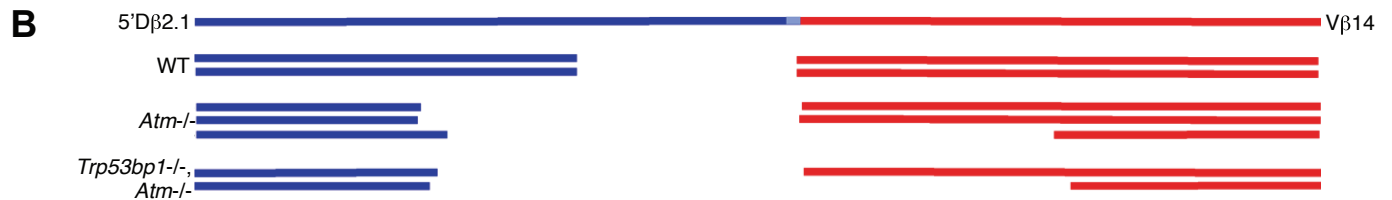

**C**

5'Dβ2.1 CCTCCCACCCATTTCTCTATAAAATGCCAGTCTAAGCAGG (-289) **GT**      AGACTCCAGGCACAGAGGTAGAAGCCAGAGTGGCTGA Vβ14

WT CCTCCCACCCATTTCTCTATAAAATGCCAGTCTAAGCAGGTGG (-286) **CCCT**      AGACTCCAGGCACAGAGGTAGAAGCCAGAGTGGCTGA

*Atm*<sup>-/-</sup> CTGGCAACCAGCTCAGAAGCTAACACATAGAGCCTAATGCA (-484) **CCCTTC** . . . ACTCCAGGCACAGAGGTAGAAGCCAGAGTGGCTGA

TTCCAGCTCAGAAGCTAACACATAGAGCCTAATGCATAGCC (-479) **GGCGC** . . . . . CCAGGCACAGAGGTAGAAGCCAGAGTGGCTGA

GGCCCACTGCATACTACGGACTAAGTAAAAGAGAAAGCTGA (-442) **TTCC** (-324) CACACACCTCTACACATACACACACACCAGCTT

GGCCCACTGCATACTACGGACTAAGTAAAAGAGAAAGCTGA (-442) **TCC** (-324) CACACACCTCTACACATACACACACACCAGCTT

AGCCCACTGCATACTACGGACTAAGTAAAAGAGAAAGCTGA (-442) **TTCT** (-324) CACACACCTCTACACATACACACACACCAGCTT

*Trp53bp1*<sup>-/-</sup>, *Atm*<sup>-/-</sup> ATAGAGCCTAATGCATAGCCCCTGCATACTACGGACTAAGTA (-456) **GTCCCGGGG** (-4) TCCAGGCACAGAGGTAGAAGCCAGAGTGGC

*Atm*<sup>-/-</sup> ATAGAGCCTAATGCATAGCCCCTGCATAC (-469) **C** (-348) CACCAGCTTGCTTGCCTTCCCTCTGAAGGGGTTAC

Figure S12

Table S1. Mendelian ratios in liveborn mice from 53BP1<sup>+/-</sup>  
/ATM<sup>+/-</sup> intercrosses (n=19 litters)

| Genotype           |                      | Observed (%) | Expected (%) | Ratio |
|--------------------|----------------------|--------------|--------------|-------|
| ATM <sup>+/+</sup> | 53BP1 <sup>+/+</sup> | 5 (4.9%)     | 6.4 (6.25%)  | 1/16  |
|                    | 53BP1 <sup>+/-</sup> | 15 (14.7%)   | 12.8 (12.5%) | 1/8   |
|                    | 53BP1 <sup>-/-</sup> | 4 (3.9%)     | 6.4 (6.25%)  | 1/16  |
| ATM <sup>+/-</sup> | 53BP1 <sup>+/+</sup> | 7 (6.9%)     | 12.8 (12.5%) | 1/8   |
|                    | 53BP1 <sup>+/-</sup> | 30 (29.4%)   | 25.5 (25%)   | 1/4   |
|                    | 53BP1 <sup>-/-</sup> | 13 (12.7%)   | 12.8 (12.5%) | 1/8   |
| ATM <sup>-/-</sup> | 53BP1 <sup>+/+</sup> | 5 (4.9%)     | 6.4 (6.25%)  | 1/16  |
|                    | 53BP1 <sup>+/-</sup> | 13 (12.7%)   | 12.8 (12.5%) | 1/8   |
|                    | 53BP1 <sup>-/-</sup> | 10 (9.8%)    | 6.4 (6.25%)  | 1/16  |
| <b>Total</b>       |                      | <b>102</b>   |              |       |

Table S2. Analysis of genomic stability in HU-treated B lymphocytes deficient for 53BP1 and/or ATM. CD43<sup>+</sup> splenocytes were activated with  $\alpha$ -CD40+IL-4 and treated with HU for 16 hours prior to fixation. Metaphase spreads were stained with a telomere probe prior to quantification of aberrations

| Mouse ID                         | Genotype                                                   | HU dose (mM) | # metaphases analyzed | # metaphases with aberrations (%) | total # aberrations (aberrations per metaphase) | types of aberrations <sup>a</sup> |
|----------------------------------|------------------------------------------------------------|--------------|-----------------------|-----------------------------------|-------------------------------------------------|-----------------------------------|
| <i>Stimulation#1</i>             |                                                            |              |                       |                                   |                                                 |                                   |
| M#1                              | wt                                                         | -            | 30                    | 0 (0.0%)                          | 0 (0.0)                                         | -                                 |
| M#2                              | <i>Atm</i> <sup>-/-</sup>                                  | -            | 30                    | 19 (63.3%)                        | 36 (1.2)                                        | 19 CB, 17 cb                      |
| M#1                              | wt                                                         | 0.25 mM      | 30                    | 5 (16.7%)                         | 6 (0.2)                                         | 5 CB, 1 cb                        |
| M#2                              | <i>Atm</i> <sup>-/-</sup>                                  | 0.25 mM      | 30                    | 21 (70.0%)                        | 76 (2.5)                                        | 24 CB, 52 cb                      |
| <i>Stimulation#2</i>             |                                                            |              |                       |                                   |                                                 |                                   |
| M#32                             | wt                                                         | -            | 30                    | 0 (0.0%)                          | 0 (0.0)                                         | -                                 |
| M#28                             | <i>Trp53bp1</i> <sup>-/-</sup>                             | -            | 30                    | 6 (20.0%)                         | 6 (0.2)                                         | 6 CB                              |
| M#30                             | <i>Atm</i> <sup>-/-</sup>                                  | -            | 30                    | 16 (53.3 %)                       | 20 (0.7)                                        | 12 CB, 7 cb, 1 CR                 |
| M#34                             | <i>Trp53bp1</i> <sup>-/-</sup> / <i>Atm</i> <sup>-/-</sup> | -            | 30                    | 21 (70.0%)                        | 43 (1.4)                                        | 27 CB, 16 cb                      |
| M#32                             | wt                                                         | 0.25 mM      | 30                    | 10 (33.3%)                        | 14 (0.5)                                        | 10 CB, 4 cb                       |
| M#28                             | <i>Trp53bp1</i> <sup>-/-</sup>                             | 0.25 mM      | 30                    | 17 (56.7%)                        | 29 (1.0)                                        | 15 CB, 13 cb, 1 CR                |
| M#30                             | <i>Atm</i> <sup>-/-</sup>                                  | 0.25 mM      | 30                    | 19 (63.3%)                        | 49 (1.6)                                        | 20 CB, 29 cb                      |
| M#34                             | <i>Trp53bp1</i> <sup>-/-</sup> / <i>Atm</i> <sup>-/-</sup> | 0.25 mM      | 30                    | 18 (60.0%)                        | 42 (1.4)                                        | 15 CB, 27 cb                      |
| <i>Stimulation#3</i>             |                                                            |              |                       |                                   |                                                 |                                   |
| M#1                              | wt                                                         | -            | 30                    | 2 (6.7%)                          | 2 (0.0)                                         | 1 CB, 1 CR                        |
| M#52                             | <i>Trp53bp1</i> <sup>-/-</sup>                             | -            | 30                    | 4 (13.3%)                         | 4 (0.1)                                         | 3 CB, 1 cb                        |
| M#54                             | <i>Atm</i> <sup>-/-</sup>                                  | -            | 30                    | 16 (53.3%)                        | 21 (0.7)                                        | 17 CB, 4 cb                       |
| M#37                             | <i>Trp53bp1</i> <sup>-/-</sup> / <i>Atm</i> <sup>-/-</sup> | -            | 30                    | 13 (43.3%)                        | 20 (0.7)                                        | 12 CB, 8 cb                       |
| M#1                              | wt                                                         | 0.25 mM      | 30                    | 8 (26.7%)                         | 13 (0.4)                                        | 6 CB, 7 cb                        |
| M#52                             | <i>Trp53bp1</i> <sup>-/-</sup>                             | 0.25 mM      | 30                    | 12 (40.0%)                        | 17 (0.6)                                        | 12 CB, 5 cb                       |
| M#54                             | <i>Atm</i> <sup>-/-</sup>                                  | 0.25 mM      | 30                    | 17 (56.7%)                        | 27 (0.9)                                        | 15 CB, 12 cb                      |
| M#37                             | <i>Trp53bp1</i> <sup>-/-</sup> / <i>Atm</i> <sup>-/-</sup> | 0.25 mM      | 30                    | 22 (73.3%)                        | 61 (2.0)                                        | 18 CB, 43 cb                      |
| <i>Stimulation#4</i>             |                                                            |              |                       |                                   |                                                 |                                   |
| M#1                              | wt                                                         | -            | 30                    | 0 (0.0%)                          | 0 (0.0)                                         | -                                 |
| M#83                             | <i>Trp53bp1</i> <sup>-/-</sup>                             | -            | 30                    | 5 (16.7%)                         | 5 (0.2)                                         | 4 CB, 1 cb                        |
| M#82                             | <i>Atm</i> <sup>-/-</sup>                                  | -            | 30                    | 10 (33.3%)                        | 11 (0.4)                                        | 6 CB, 2 cb, 3 CR                  |
| M#72                             | <i>Trp53bp1</i> <sup>-/-</sup> / <i>Atm</i> <sup>-/-</sup> | -            | 30                    | 15 (50.0%)                        | 24 (0.8)                                        | 19 CB, 4 cb, 1 CR                 |
| M#1                              | wt                                                         | 0.25 mM      | 30                    | 4 (13.3%)                         | 5 (0.2)                                         | 1 CB, 1 cb                        |
| M#83                             | <i>Trp53bp1</i> <sup>-/-</sup>                             | 0.25 mM      | 30                    | 5 (16.7%)                         | 5 (0.2)                                         | 4 CB, 1 cb                        |
| M#82                             | <i>Atm</i> <sup>-/-</sup>                                  | 0.25 mM      | 30                    | 19 (63.3%)                        | 67 (2.2)                                        | 10 CB, 57 cb                      |
| M#72                             | <i>Trp53bp1</i> <sup>-/-</sup> / <i>Atm</i> <sup>-/-</sup> | 0.25 mM      | 30                    | 19 (63.3%)                        | 45 (1.5)                                        | 16 CB, 29 cb                      |
| <i>Summary (n=4 experiments)</i> |                                                            |              |                       |                                   |                                                 |                                   |
|                                  | wt                                                         | -            | 90                    | 2 (2.2%)                          | 6 (0.1)                                         | 3 CT, 2 ACT, 1 cb                 |
|                                  | <i>Trp53bp1</i> <sup>-/-</sup>                             | -            | 90                    | 15 (16.7%)                        | 17 (0.2)                                        | 10 CT, 5 ACT, 2 cb                |
|                                  | <i>Atm</i> <sup>-/-</sup>                                  | -            | 90                    | 42 (46.7%)                        | 62 (0.7)                                        | 33 CT, 18 ACT, 11 cb              |
|                                  | <i>Trp53bp1</i> <sup>-/-</sup> / <i>Atm</i> <sup>-/-</sup> | -            | 90                    | 49 (54.4%)                        | 95 (1.1)                                        | 43 CT, 24 ACT, 28 cb              |
|                                  | wt                                                         | 0.25 mM      | 120                   | 27 (22.5%)                        | 38 (0.32)                                       | 22 CB, 16 cb                      |
|                                  | <i>Trp53bp1</i> <sup>-/-</sup>                             | 0.25 mM      | 90                    | 34 (37.8%)                        | 52 (0.58)                                       | 33 CB, 19 cb                      |
|                                  | <i>Atm</i> <sup>-/-</sup>                                  | 0.25 mM      | 120                   | 76 (63.3%)                        | 219 (1.83)                                      | 69 CB, 150 cb                     |
|                                  | <i>Trp53bp1</i> <sup>-/-</sup> / <i>Atm</i> <sup>-/-</sup> | 0.25 mM      | 90                    | 59 (65.6%)                        | 148 (1.64)                                      | 49 CB, 99 cb                      |

<sup>a</sup>CB, chromosome break; cb, chromatid break; CR, chromosomal rearrangement

Table S3. Analysis of genomic stability in  $\alpha$ -CD40+IL-4activated B lymphocytes deficient for 53BP1 and/or ATM. Metaphases were obtained 24 hr after IR and stained with a telomere probe. For data on individual experiments, see Table S .

| Genotype                                                 | IR dose (Gy) | # mice | # metaphases | % metaphases with aberrations | total # aberrations (aberrations per metaphase) | p value (# aberrations per metaphase)                                                                  |
|----------------------------------------------------------|--------------|--------|--------------|-------------------------------|-------------------------------------------------|--------------------------------------------------------------------------------------------------------|
| wt                                                       | mock         | 6      | 180          | 2.8 ± 3.3                     | 0.0±0.0                                         |                                                                                                        |
| <i>Trp53bp1</i> <sup>-/-</sup>                           | mock         | 6      | 180          | 16.1 ± 3.3                    | 0.2±0.1                                         | p= 0.004 (vs wt)                                                                                       |
| <i>Atm</i> <sup>-/-</sup>                                | mock         | 6      | 180          | 45 ± 10.7                     | 0.8±0.3                                         | p=0.02 (vs wt)                                                                                         |
| <i>Trp53bp1</i> <sup>-/-</sup> <i>Atm</i> <sup>-/-</sup> | mock         | 6      | 180          | 46.1 ± 14.4                   | 0.9±0.4                                         | p=0.0019 (vs wt); p=0.005 (vs <i>Trp53bp1</i> <sup>-/-</sup> ); p=0.74 (vs <i>Atm</i> <sup>-/-</sup> ) |
| wt                                                       | 2 Gy         | 6      | 180          | 39.4 ± 8.5                    | 0.9±0.2                                         |                                                                                                        |
| <i>Trp53bp1</i> <sup>-/-</sup>                           | 2 Gy         | 6      | 180          | 75.6 ± 8.6                    | 3.6±1.5                                         | p= 0.006 (vs wt)                                                                                       |
| <i>Atm</i> <sup>-/-</sup>                                | 2 Gy         | 6      | 172          | 93.3 ± 6.3                    | 4.7±1.1                                         | p=0.0002 (vs wt)                                                                                       |
| <i>Trp53bp1</i> <sup>-/-</sup> <i>Atm</i> <sup>-/-</sup> | 2 Gy         | 6      | 180          | 96.1 ± 3.8                    | 6.4±1.8                                         | p=0.0006 (vs wt); p=0.01 (vs <i>Trp53bp1</i> <sup>-/-</sup> ); p=0.08 (vs <i>Atm</i> <sup>-/-</sup> )  |

Table S4. Analysis of genomic stability in  $\alpha$ -CD40/IL-4 activated B cells deficient for 53BP1 and/or ATM. Metaphase spreads were obtained 24 hr after IR and stained with a telomere probe.

| Mouse ID              | Genotype                                                 | IR dose (Gy) | # metaphases analyzed | # metaphases with aberrations (%) | total # aberrations (aberrations per metaphase) | types of aberrations <sup>a</sup> |
|-----------------------|----------------------------------------------------------|--------------|-----------------------|-----------------------------------|-------------------------------------------------|-----------------------------------|
| <i>Stimulation#1</i>  |                                                          |              |                       |                                   |                                                 |                                   |
| M#32                  | wt                                                       | mock         | 30                    | 0 (0.0%)                          | 0 (0.0)                                         | -                                 |
| M#28                  | <i>Trp53bp1</i> <sup>-/-</sup>                           | mock         | 30                    | 6 (20.0%)                         | 8 (0.3)                                         | 6 CT, 2 ACT                       |
| M#30                  | <i>Atm</i> <sup>-/-</sup>                                | mock         | 30                    | 16 (53.3%)                        | 21 (0.7)                                        | 11 CT, 5 ACT, 5 cb                |
| M#34                  | <i>Trp53bp1</i> <sup>-/-</sup> <i>Atm</i> <sup>-/-</sup> | mock         | 30                    | 21 (70.0%)                        | 44 (1.5)                                        | 16 CT, 12 ACT, 16 cb              |
| M#32                  | wt                                                       | 2 Gy         | 30                    | 15 (50%)                          | 24 (0.8)                                        | 15 CT, 9 ACT                      |
| M#28                  | <i>Trp53bp1</i> <sup>-/-</sup>                           | 2 Gy         | 30                    | 23 (76.7%)                        | 73 (2.4)                                        | 40 CT, 27 ACT, 6 cb               |
| M#30                  | <i>Atm</i> <sup>-/-</sup>                                | 2 Gy         | 22                    | 22 (100%)                         | 117 (5.3)                                       | 62 CT, 43 ACT, 12 cb              |
| M#34                  | <i>Trp53bp1</i> <sup>-/-</sup> <i>Atm</i> <sup>-/-</sup> | 2 Gy         | 30                    | 30 (100%)                         | 1890 (6.0)                                      | 76 CT, 67 ACT, 37 cb              |
| <i>Stimulation#2</i>  |                                                          |              |                       |                                   |                                                 |                                   |
| M#1                   | wt                                                       | mock         | 30                    | 2 (6.7%)                          | 6 (0.2)                                         | 3 CT, 2 ACT, 1 cb                 |
| M#52                  | <i>Trp53bp1</i> <sup>-/-</sup>                           | mock         | 30                    | 4 (13.3%)                         | 4 (0.1)                                         | 1 CT, 2 ACT, 1 cb                 |
| M#54                  | <i>Atm</i> <sup>-/-</sup>                                | mock         | 30                    | 16 (53.3%)                        | 24 (0.8)                                        | 15 CT, 5 ACT, 4 cb                |
| M#37                  | <i>Trp53bp1</i> <sup>-/-</sup> <i>Atm</i> <sup>-/-</sup> | mock         | 30                    | 13 (43.3%)                        | 23 (0.8)                                        | 9 CT, 6 ACT, 8 cb                 |
| M#1                   | wt                                                       | 2 Gy         | 30                    | 11 (36.7%)                        | 32 (1.1)                                        | 11 CT, 17 ACT, 4 cb               |
| M#52                  | <i>Trp53bp1</i> <sup>-/-</sup>                           | 2 Gy         | 30                    | 25 (83.3%)                        | 188 (6.3)                                       | 92 CT, 68 ACT, 28 cb              |
| M#54                  | <i>Atm</i> <sup>-/-</sup>                                | 2 Gy         | 30                    | 27 (90.0%)                        | 126 (4.2)                                       | 64 CT, 41 ACT, 21 cb              |
| M#37                  | <i>Trp53bp1</i> <sup>-/-</sup> <i>Atm</i> <sup>-/-</sup> | 2 Gy         | 30                    | 27 (90.0%)                        | 159 (5.3)                                       | 72 CT, 53 ACT, 34 cb              |
| <i>Stimulation#3</i>  |                                                          |              |                       |                                   |                                                 |                                   |
| M#1                   | wt                                                       | mock         | 30                    | 0 (0.0%)                          | 0 (0.0)                                         | -                                 |
| M#83                  | <i>Trp53bp1</i> <sup>-/-</sup>                           | mock         | 30                    | 5 (16.7%)                         | 5 (0.2)                                         | 3 CT, 1 ACT, 1 cb                 |
| M#82                  | <i>Atm</i> <sup>-/-</sup>                                | mock         | 30                    | 10 (33.3%)                        | 17 (0.6)                                        | 7 CT, 8 ACT, 2 cb                 |
| M#72                  | <i>Trp53bp1</i> <sup>-/-</sup> <i>Atm</i> <sup>-/-</sup> | mock         | 30                    | 15 (50.0%)                        | 28 (0.9)                                        | 18 CT, 6 ACT, 4 cb                |
| M#1                   | wt                                                       | 2 Gy         | 30                    | 10 (33.3%)                        | 15 (0.5)                                        | 11 CT, 3 ACT, 1 cb                |
| M#83                  | <i>Trp53bp1</i> <sup>-/-</sup>                           | 2 Gy         | 30                    | 25 (83.3%)                        | 86 (2.9)                                        | 52 CT, 30 ACT, 4 cb               |
| M#82                  | <i>Atm</i> <sup>-/-</sup>                                | 2 Gy         | 30                    | 28 (93.3%)                        | 94 (3.1)                                        | 48 CT, 28 ACT, 18 cb              |
| M#72                  | <i>Trp53bp1</i> <sup>-/-</sup> <i>Atm</i> <sup>-/-</sup> | 2 Gy         | 30                    | 29 (96.7%)                        | 108 (3.6)                                       | 52 CT, 44 ACT, 12 cb              |
| <i>Stimulation#4</i>  |                                                          |              |                       |                                   |                                                 |                                   |
| M#3                   | wt                                                       | mock         | 30                    | 0 (0.0%)                          | 0 (0.0)                                         | -                                 |
| M#7                   | <i>Trp53bp1</i> <sup>-/-</sup>                           | mock         | 30                    | 4 (13.3%)                         | 5 (0.2)                                         | 2 CT, 2 ACT, 1 cb                 |
| M#8                   | <i>Atm</i> <sup>-/-</sup>                                | mock         | 30                    | 14 (46.7%)                        | 37 (1.2)                                        | 18 CT, 8 ACT, 11 cb               |
| M#5                   | <i>Trp53bp1</i> <sup>-/-</sup> <i>Atm</i> <sup>-/-</sup> | mock         | 30                    | 10 (33.3%)                        | 14 (0.5)                                        | 6 CT, 4 ACT, 4 cb                 |
| M#3                   | wt                                                       | 2 Gy         | 30                    | 11 (36.7%)                        | 34 (1.1)                                        | 17 CT, 9 ACT, 8 cb                |
| M#7                   | <i>Trp53bp1</i> <sup>-/-</sup>                           | 2 Gy         | 30                    | 19 (63.3%)                        | 84 (2.8)                                        | 49 CT, 32 ACT, 3 cb               |
| M#8                   | <i>Atm</i> <sup>-/-</sup>                                | 2 Gy         | 30                    | 30 (100%)                         | 188 (6.3)                                       | 87 CT, 79 ACT, 22 cb              |
| M#5                   | <i>Trp53bp1</i> <sup>-/-</sup> <i>Atm</i> <sup>-/-</sup> | 2 Gy         | 30                    | 29 (96.7%)                        | 254 (8.5)                                       | 136 CT, 92 ACT, 26 cb             |
| <i>Stimulation#5</i>  |                                                          |              |                       |                                   |                                                 |                                   |
| M#20                  | wt                                                       | mock         | 30                    | 1 (3.3%)                          | 1 (0.03)                                        | 1 CT                              |
| M#10                  | <i>Trp53bp1</i> <sup>-/-</sup>                           | mock         | 30                    | 4 (13.3%)                         | 8 (0.3)                                         | 6 CT, 2 ACT                       |
| M#24                  | <i>Atm</i> <sup>-/-</sup>                                | mock         | 30                    | 16 (53.3%)                        | 32 (1.1)                                        | 15 CT, 6 ACT, 11 cb               |
| M#27                  | <i>Trp53bp1</i> <sup>-/-</sup> <i>Atm</i> <sup>-/-</sup> | mock         | 30                    | 15 (50.0%)                        | 31 (1.0)                                        | 22 CT, 7 ACT, 2 cb                |
| M#20                  | wt                                                       | 2 Gy         | 30                    | 15 (50.0%)                        | 30 (1.0)                                        | 19 CT, 11 ACT                     |
| M#10                  | <i>Trp53bp1</i> <sup>-/-</sup>                           | 2 Gy         | 30                    | 24 (80.0%)                        | 134 (4.5)                                       | 78 CT, 51 ACT, 5 cb               |
| M#24                  | <i>Atm</i> <sup>-/-</sup>                                | 2 Gy         | 30                    | 25 (83.3%)                        | 145 (4.8)                                       | 84 CT, 58 ACT, 3 cb               |
| M#27                  | <i>Trp53bp1</i> <sup>-/-</sup> <i>Atm</i> <sup>-/-</sup> | 2 Gy         | 30                    | 28 (93.3%)                        | 241 (8.0)                                       | 131 CT, 86 ACT, 24 cb             |
| <i>Stimulation #6</i> |                                                          |              |                       |                                   |                                                 |                                   |
| M#1                   | wt                                                       | mock         | 30                    | 2 (6.7%)                          | 2 (0.06)                                        | 2 CT                              |
| M#44                  | <i>Trp53bp1</i> <sup>-/-</sup>                           | mock         | 30                    | 6 (20.0%)                         | 11 (0.4)                                        | 7 CT, 4 ACT                       |
| M#30                  | <i>Atm</i> <sup>-/-</sup>                                | mock         | 30                    | 9 (30.0%)                         | 16 (0.5)                                        | 12 CT, 2 ACT, 2 cb                |
| M#39                  | <i>Trp53bp1</i> <sup>-/-</sup> <i>Atm</i> <sup>-/-</sup> | mock         | 30                    | 9 (30.0%)                         | 18 (0.6)                                        | 10 CT, 5 ACT, 3 cb                |
| M#1                   | wt                                                       | 2 Gy         | 30                    | 9 (30.0%)                         | 27 (0.9)                                        | 10 CT, 9 ACT, 8 cb                |
| M#44                  | <i>Trp53bp1</i> <sup>-/-</sup>                           | 2 Gy         | 30                    | 20 (66.7%)                        | 83 (2.8)                                        | 36 CT, 32 ACT, 15 cb              |
| M#30                  | <i>Atm</i> <sup>-/-</sup>                                | 2 Gy         | 30                    | 28 (93.3%)                        | 138 (4.6)                                       | 74 CT, 61 ACT, 3 cb               |
| M#39                  | <i>Trp53bp1</i> <sup>-/-</sup> <i>Atm</i> <sup>-/-</sup> | 2 Gy         | 30                    | 30 (100.0%)                       | 205 (6.8)                                       | 104 CT, 98ACT, 3 cb               |

<sup>a</sup>CT, centric; ACT, acentric; cb, chromatid break

Table S5. Analysis of genomic stability in LPS-activated B cells deficient for 53BP1 and/or ATM. Metaphases were obtained 24 hr after exposure to IR and stained with a telomere probe

| Mouse ID                         | Genotype                                                   | IR dose (Gy) | # metaphases analyzed | # metaphases with aberrations (%) | total # aberrations (aberrations per metaphase) | types of aberrations <sup>a</sup> |
|----------------------------------|------------------------------------------------------------|--------------|-----------------------|-----------------------------------|-------------------------------------------------|-----------------------------------|
| <i>Stimulation #1</i>            |                                                            |              |                       |                                   |                                                 |                                   |
| M#3                              | wt                                                         | mock         | 30                    | 0 (0.0%)                          | 0 (0.0)                                         | -                                 |
| M#7                              | <i>Trp53bp1</i> <sup>-/-</sup>                             | mock         | 30                    | 3 (10%)                           | 3 (0.1)                                         | 2CT, 1 ACT                        |
| M#8                              | <i>Atm</i> <sup>-/-</sup>                                  | mock         | 30                    | 13 (43.3%)                        | 23 (0.8)                                        | 13 CT, 7 ACT, 3 cb                |
| M#5                              | <i>Trp53bp1</i> <sup>-/-</sup> <i>Atm</i> <sup>-/-</sup>   | mock         | 30                    | 14 (46.7%)                        | 23 (0.8)                                        | 11 CT, 3 ACT, 9 cb                |
| M#3                              | wt                                                         | 2 Gy         | 30                    | 14 (46.7%)                        | 38 (1.3)                                        | 18 CT, 19 ACT, 1 cb               |
| M#7                              | <i>Trp53bp1</i> <sup>-/-</sup>                             | 2 Gy         | 30                    | 18 (60.0%)                        | 56 (1.9)                                        | 22 CT, 34 ACT                     |
| M#8                              | <i>Atm</i> <sup>-/-</sup>                                  | 2 Gy         | 30                    | 27 (90%)                          | 100 (3.3)                                       | 54 CT, 42 ACT, 4 cb               |
| M#5                              | <i>Trp53bp1</i> <sup>-/-</sup> <i>Atm</i> <sup>-/-</sup>   | 2 Gy         | 30                    | 30 (100%)                         | 129 (4.3)                                       | 69 CT, 49 ACT, 11 cb              |
| <i>Stimulation #2</i>            |                                                            |              |                       |                                   |                                                 |                                   |
| M#20                             | wt                                                         | mock         | 30                    | 1 (3.3%)                          | 1 (0.03)                                        | 1 CT                              |
| M#10                             | <i>Trp53bp1</i> <sup>-/-</sup>                             | mock         | 30                    | 2 (6.7%)                          | 3 (0.1)                                         | 2 CT, 1 ACT                       |
| M#24                             | <i>Atm</i> <sup>-/-</sup>                                  | mock         | 30                    | 12 (40.0%)                        | 17 (0.6)                                        | 12 CT, 4 ACT, 1 cb                |
| M#27                             | <i>Trp53bp1</i> <sup>-/-</sup> <i>Atm</i> <sup>-/-</sup>   | mock         | 30                    | 14 (46.7%)                        | 24 (0.8)                                        | 17 CT, 4 ACT, 3 cb                |
| M#20                             | wt                                                         | 2 Gy         | 30                    | 12 (40.0%)                        | 29 (1.0)                                        | 21 CT, 8 ACT                      |
| M#10                             | <i>Trp53bp1</i> <sup>-/-</sup>                             | 2 Gy         | 30                    | 19 (63.3%)                        | 110 (3.7)                                       | 59 CT, 38 ACT, 13 cb              |
| M#24                             | <i>Atm</i> <sup>-/-</sup>                                  | 2 Gy         | 30                    | 27 (90.0%)                        | 110 (3.7)                                       | 58 CT, 42 ACT, 10 cb              |
| M#27                             | <i>Trp53bp1</i> <sup>-/-</sup> <i>Atm</i> <sup>-/-</sup>   | 2 Gy         | 30                    | 24 (80%)                          | 118 (3.9)                                       | 8 CT, 41 ACT, 9 cb                |
| <i>Stimulation #3</i>            |                                                            |              |                       |                                   |                                                 |                                   |
| M#1                              | wt                                                         | mock         | 30                    | 3 (10%)                           | 3 (0.1)                                         | 3 CT                              |
| M#44                             | <i>Trp53bp1</i> <sup>-/-</sup>                             | mock         | 30                    | 4 (13.3%)                         | 8 (0.3)                                         | 7 CT, 1 ACT                       |
| M#30                             | <i>Atm</i> <sup>-/-</sup>                                  | mock         | 30                    | 11 (36.7%)                        | 16 (0.5)                                        | 10CT, 6 ACT                       |
| M#39                             | <i>Trp53bp1</i> <sup>-/-</sup> <i>Atm</i> <sup>-/-</sup>   | mock         | 30                    | 14 (46.7%)                        | 18 (0.6)                                        | 12 CT, 6 ACT                      |
| M#1                              | wt                                                         | 2 Gy         | 30                    | 13 (43.3%)                        | 15 (0.5)                                        | 15 CT                             |
| M#44                             | <i>Trp53bp1</i> <sup>-/-</sup>                             | 2 Gy         | 30                    | 14 (46.7%)                        | 41 (1.4)                                        | 22 CT, 19 ACT                     |
| M#30                             | <i>Atm</i> <sup>-/-</sup>                                  | 2 Gy         | 30                    | 28 (93.3%)                        | 122 (4.1)                                       | 71 CT, 46 ACT, 5 cb               |
| M#39                             | <i>Trp53bp1</i> <sup>-/-</sup> <i>Atm</i> <sup>-/-</sup>   | 2 Gy         | 30                    | 29 (96.7%)                        | 145 (4.8)                                       | 87 CT, 57 ACT, 1 cb               |
| <i>Summary (n=3 experiments)</i> |                                                            |              |                       |                                   |                                                 |                                   |
|                                  | wt                                                         | mock         | 90                    | 4 (4.4%)                          | 4 (0.04)                                        | 4 CT                              |
|                                  | <i>Trp53bp1</i> <sup>-/-</sup>                             | mock         | 90                    | 9 (10.0%)                         | 14 (0.16)                                       | 11 CT, 3 ACT                      |
|                                  | <i>Atm</i> <sup>-/-</sup>                                  | mock         | 90                    | 36 (40%)                          | 56 (0.6)                                        | 35 CT, 17 ACT, 4 cb               |
|                                  | <i>Trp53bp1</i> <sup>-/-</sup> / <i>Atm</i> <sup>-/-</sup> | mock         | 90                    | 42 (46.7%)                        | 65 (0.7)                                        | 40 CT, 13 ACT, 12 cb              |
|                                  | wt                                                         | 2 Gy         | 90                    | 39 (43.3%)                        | 82 (0.91)                                       | 54 CT, 27 ACT, 1 cb               |
|                                  | <i>Trp53bp1</i> <sup>-/-</sup>                             | 2 Gy         | 90                    | 51 (56.7%)                        | 207 (2.3)                                       | 103 CT, 91 ACT, 13 cb             |
|                                  | <i>Atm</i> <sup>-/-</sup>                                  | 2 Gy         | 90                    | 82 (91.1%)                        | 332 (3.7)                                       | 183 CT, 130 ACT, 19 cb            |
|                                  | <i>Trp53bp1</i> <sup>-/-</sup> / <i>Atm</i> <sup>-/-</sup> | 2 Gy         | 90                    | 83 (92.2%)                        | 392 (4.4)                                       | 224 CT, 147 ACT, 21 cb            |

<sup>a</sup>CT, centric; ACT, acentric; cb, chromatid break

Table S6. Analysis of genomic stability in T lymphocytes deficient for 53BP1 and/or ATM. CD43<sup>+</sup> splenocytes were activated with concanavalin A and, 24 hours after irradiation, fixed and analyzed by telomere FISH

| Genotype                                                   | # mice | # metaphases analyzed | IR dose | # metaphases with aberrations (%) | total # aberrations (aberrations per metaphase) | types of aberrations <sup>a</sup> |
|------------------------------------------------------------|--------|-----------------------|---------|-----------------------------------|-------------------------------------------------|-----------------------------------|
| wt                                                         | 3      | 90                    | mock    | 2 (2.2%)                          | 2 (0.02)                                        | 2 CT                              |
| <i>Trp53bp1</i> <sup>-/-</sup>                             | 3      | 80                    | mock    | 5 (6.3%)                          | 5 (0.06)                                        | 3 CT, 1 ACT, 1cb                  |
| <i>Atm</i> <sup>-/-</sup>                                  | 3      | 90                    | mock    | 30 (33.3%)                        | 52 (0.5)                                        | 28 CT, 18 ACT, 6 cb               |
| <i>Trp53bp1</i> <sup>-/-</sup> / <i>Atm</i> <sup>-/-</sup> | 3      | 80                    | mock    | 23 (28.7%)                        | 28 (0.3)                                        | 20 CT, 4 CT, 4 cb                 |
| wt                                                         | 3      | 80                    | 2 Gy    | 26 (32.5%)                        | 36 (0.4)                                        | 28 CT, 8 ACT                      |
| <i>Trp53bp1</i> <sup>-/-</sup>                             | 3      | 90                    | 2 Gy    | 46 (51.1%)                        | 189 (2.1)                                       | 100 CT, 75 ACT, 14 cb             |
| <i>Atm</i> <sup>-/-</sup>                                  | 3      | 83                    | 2 Gy    | 64 (77.1%)                        | 257 (3.0)                                       | 123 CT, 107 ACT, 27 cb            |
| <i>Trp53bp1</i> <sup>-/-</sup> / <i>Atm</i> <sup>-/-</sup> | 3      | 80                    | 2 Gy    | 72 (90.0%)                        | 277 (3.4)                                       | 146 CT, 84 ACT, 47 cb             |

<sup>a</sup>CT, centric, ACT, acentric, cb, chromatid break
